# Supplementary material for: Ready protease-catalyzed synthesis of carbohydrate–amino acid conjugates
Source: Royal Society of Chemistry journal article supplement (doi:10.1039/b104137c), 2001-01-01
Supplement: b104137c-s1esi.pdf [file b104137c-s1esi.pdf]

Phe, Asp, Glu

**1-3a**

(i)

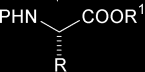

**1-8b**

(ii)

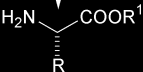

**1-8c**

**1b:** R = CH<sub>2</sub>Ph,

**2b:** R = CH<sub>2</sub>Ph,

**3b:** R = CH<sub>2</sub>Ph,

**4b:** R = CH<sub>2</sub>COOH,

**5b:** R = CH<sub>2</sub>COOBn,

**6b:** R = CH<sub>2</sub>COOH,

**7b:** R = CH<sub>2</sub>CH<sub>2</sub>COOH,

**8b:** R = CH<sub>2</sub>CH<sub>2</sub>COOBn,

**1c:** R = CH<sub>2</sub>Ph,

**2c:** R = CH<sub>2</sub>Ph,

**3c:** R = CH<sub>2</sub>Ph,

**4c:** R = CH<sub>2</sub>COO-CH=CH<sub>2</sub>,

**5c:** R = CH<sub>2</sub>COOBn,

**6c:** R = CH<sub>2</sub>COO-CH=CH<sub>2</sub>,

**7c:** R = CH<sub>2</sub>CH<sub>2</sub>COO-CH=CH<sub>2</sub>,

**8c:** R = CH<sub>2</sub>CH<sub>2</sub>COOBn,

P = Ac, R<sup>1</sup> = H

P = Boc, R<sup>1</sup> = H

P = Z, R<sup>1</sup> = H

P = Fmoc, R<sup>1</sup> = Bn

P = Fmoc, R<sup>1</sup> = H

P = Boc, R<sup>1</sup> = Bn

P = Boc, R<sup>1</sup> = Bn

P = Z, R<sup>1</sup> = H

P = Ac, R<sup>1</sup> =

P = Boc, R<sup>1</sup> =

P = Z, R<sup>1</sup> =

P = Fmoc, R<sup>1</sup> = Bn

P = Fmoc, R<sup>1</sup> =

P = Boc, R<sup>1</sup> = Bn

P = Boc, R<sup>1</sup> = Bn

P = Z, R<sup>1</sup> =
