# Supplementary material for: Ready protease-catalyzed synthesis of carbohydrate–amino acid conjugates
Source: Royal Society of Chemistry journal article supplement (doi:10.1039/b104137c), 2001-01-01
Supplement: b104137c.doc [file b104137c.doc]

## Supplementary Information for Boyer et al

Vinyl *N*-acetyl-L-phenylalaninate **1c**

A mixture of *N*-acetyl-L-phenylalanine **1b** (10 g, 48 mmol), vinyl acetate (450mL, 4.8 mol), palladium acetate (2.1 g, 9.3 mmol) and potassium hydroxide (270 mg, 4.8 mmol) was stirred for 24h at r. t. The mixture was then poured into ether (1.5 L) and filtered through a celite bed. After evaporation *in vacuo* the crude product was purified by flash chromatography (hexane: EtOAc 1:1 v/v) to give vinyl *N*-acetyl-L-phenylalaninate **1c** (4.5 g, 40%); m.p. 90-93°C; []D25 +29.6 (c 0.4, CHCl3); [lit.**[[1]](#endnote-2)** m.p. 90.0–91.0 °C; []D25 +32.7 (c 1.05, CHCl3)]; 13C NMR (50 MHz, CDCl3) 168.8, 167.9 (C=O), 139.7 (CH vinyl), 134.4, 128.3, 127.7, 126.2 (C arom.), 98.2 (CH2 vinyl), 51.9 (C), 36.5 (C), 22.0 (NHCOCH3); 1H NMR (300MHz, CDCl3)  7.3-7.0 (6H, m, Ar, CH2=CH-), 5.90 (sbr, 1H, NH), 4.81 (2H, m), 4.63 (dd, *J* 1.8 Hz, *J* 6.3 Hz, 1H), 3.08 (2H, m), 1.9 (s, 3H, NHCOCH3); m/z (ES+): 256 (100, [M+Na]+).

*N*-*tert*-Butyloxycarbonyl-L-phenylalanine vinyl ester **2c**

L-phenylalanine (5 g; 0.03 mol) was dissolved in an aqueous solution of sodium hydroxide (1N; 60 mL) and di-*tert*-butyl-dicarbonate (8g; 0.04 mol) in solution in dioxane (20 mL) was slowly added at 0oC. After one night, the mixture was neutralised with an aqueous solution of HCl (1N), and extracted with ethyl acetate (3 times). The organic layers were dried over sulfate magnesium and concentrated *in* *vacuo* to give a white solid **2b**. The crude acid **2b** was dissolved in vinyl acetate (280 mL; 100 eq.), then palladium acetate (1.3 g; 0.2 eq.) and potassium hydroxide (168 mg; 0.1 eq.) were added. The mixture was stirred overnight at r. t., then poured into diethyl ether and filtered through a celite bed. After concentration *in vacuo*, the crude product was purified by flash chromatography (hexane/ ethyl acetate 6/ 1 v/ v) to give the acyl donor **2c** as a pale yellow oil (6 g; 68 % over two steps): []D25 +9.3 (c 1.82, CHCl3); max (film): 3436 cm-1 (NH), 1757 cm-1 (C=O), 1712 cm-1 (C=O), 1647 cm-1, 1497 cm-1; 13C NMR (125 MHz, CDCl3)  169.4, 155.3 (2 x C=O), 141.1 (CH vinyl), 135.8, 129.5, 128.9, 127.4 (C arom), 99.2 (CH2 vinyl), 80.4 (C(CH3)3), 54.5 (C), 38.2 (C), 28.5 (C(CH3)3); 1H NMR (500 MHz, CDCl3)  7.31-7.14 (m, 6H, Ar, CH2=CH-), 4.98 (d br, *J* 8.7 Hz; 1H; NH), 4.94 (dd, *J* 1.9 Hz, *J* 13.8 Hz, 1H, CHH’=CH-), 4.68 (m, 1H, CHH’=CH-), 4.66 (dd, *J* 1.7 Hz; *J* 6.2 Hz, 1H, H), 3.17 (dd, *J* 6.2 Hz, *J* 14.5 Hz, 1H, CHH’), 3.11 (dd, *J* 1.7 Hz, *J* 14.5 Hz, 1H, CHH’); MS (ES+) m/z= 292 (20, [M+H]+), 314 (40, [M+Na]+), 330 (100, [M+K]+); HRMS (ES+): C16H22O4N calculated 292.1549; measured 292.1547 [M+H]+.

*N*-Benzyloxycarbonyl-L-phenylalanine vinyl ester **3c**

L-phenylalanine (0.5 g; 3.0 mmol) was dissolved in a mixture of toluene (6 mL) and aqueous solution of sodium hydroxide (3N; 4.5 mL). Then, benzyl chloroformate (0.6 mL; 1.3 eq.) was added at 0oC. After 16 h, the layers were separated and the organic layer was washed with an aqueous solution of sodium hydroxide (3N). The combined aqueous layers were acidified with an aqueous solution of HCl (3N), then extracted with chloroform. The combined organic layers were dried over magnesium sulfate and concentrated *in* *vacuo* to give a white solid. The crude acid was dissolved in vinyl acetate (30 mL; 100 eq.), and palladium acetate (136 mg; 0.2 eq.) and potassium hydroxide (17 mg; 0.1 eq.) were added. The mixture was stirred overnight at r. t., then poured into diethyl ether and filtered through a celite bed. After concentration *in vacuo*, the crude product was purified by flash chromatography (hexane/ ethyl acetate 5/ 1 v/ v) to give the vinyl ester **3c** as a colourless oil (0.6 g; 60 % over two steps): []D25 +17.9 (c 0.57, CHCl3); max (film): 3332 cm-1 (NH), 1758 cm-1 (C=O), 1721 cm-1 (C=O), 1646 cm-1, 1511 cm-1; 13C NMR (125 MHz, CDCl3)  168.8, 155.6 (2 x CO); 140.8 (CH vinyl), 136.1, 135.2, 129.3, 128.7, 128.5, 128.2, 128.1, 127.3 (C arom), 99.2 (CH2 vinyl), 67.1 (CH2 benzyl), 54.6 (C), 37.9 (C); 1H NMR (500 MHz, CDCl3)  7.40-7.10 (11H; m; Ar, CH2=CH-), 5.24 (d, *J* 8.9 Hz, 1H, NH), 5.12 (s; 2H; CH2 benzyl group), 4.96 (dd; *J* 1.8 Hz; *J* 14.9 Hz; 1H; CHH’=CH-); 4.76 (dd; *J* 5.9 Hz; *J* 14.9 Hz; 1H; CHH’=CH-); 4.68 (dd; *J* 1.7 Hz; *J* 6.1 Hz; 1H; H); 3.20 (dd; *J* 6.2 Hz; *J* 10.9 Hz; 1H; CHH’), 3.15 (dd; *J* 1.7 Hz; *J* 10.9 Hz; 1H; CHH’); MS (ES+) m/z = 326 (55, [M+H]+); 348 (48, [M+Na]+); 364 (100, [M+K]+); HRMS (ES+): C19H20O4N calculated 326.1392; measured 326.1391 [M+H]+.

Benzyl -vinyl-*N*-(9-fluorenylmethoxycarbonyl)-L-aspartate **4c**

Benzyl *N*-(9-fluorenylmethoxycarbonyl)-L-aspartate **4b****[[2]](#endnote-3)** (0.5 g; 1.12 mmol) was dissolved in vinyl acetate (100 eq.; 10.5 mL). Palladium acetate (0.2 eq.; 50 mg) and potassium hydroxide (0.1 eq.; 6 mg) were added. The mixture was stirred for 24h at r.t. The reaction mixture was poured into diethyl ether and filtered through a celite bed. After evaporation *in vacuo*, the crude product was purified by flash chromatography (hexane: ethyl acetate 5:1 v/v) to give vinyl ester **4c** (421 mg; 80%):mp 93-95°C (hexane: ethyl acetate);[]D25  +6.4 (c, 0.36 CHCl3); max (film): 3432 cm-1 (NH), 1754 cm-1 (C=O), 1646 cm-1 (amide I), 1510 cm-1 (amide II); 1H NMR (500 MHz; CDCl3) : 7.77-7.59, 7.43-7.30 (m; 13H; benzyl and Fmoc), 7.00 (dd, *J* 6.0 Hz, *J* 13.7 Hz, 1H, CH2=CH-), 5.83 (d, *J* 8.5 Hz, 1H, NH), 5.23 (s, CH2 benzyl group), 4.92 (dd, *J* 1.5 Hz, *J* 13.7 Hz, 1H, CHH’=CH-), 4.73 (m, 1H, CHH’=CH-), 4.64 (dd, *J* 1.5 Hz, *J* 6.0 Hz, 1H), 4.39 (m, 2H, CH2 Fmoc), 4.23 (pt, *J* 7.0 Hz, 1H, CH Fmoc), 3.16 (dd; *J* 4.5 Hz, *J* 17.5 Hz, 1H, CHH’); 2.99 (dd; *J* 4.5 Hz; *J* 17.5 Hz, CHH’); 13C NMR (125 MHz; CDCl3) : 170.5, 168.3, 156.1 (3 x C=O); 144.0, 143.9, 141.5, 141.5, 140.9, 135.2, 128.9, 128.6, 127.9, 127.3, 125.4, 120.2 (C arom, CH vinyl); 98.9 (CH2 vinyl); 68.0, 67.6 (CH2 benzyl, CH2 Fmoc); 50.6, 47.3 (2 x CH); 36.7 (CH2); MS (ES+) m/z=494 (100, [M+Na]+); HRMS (ES+): calculated for C28H26NO6 472.1760; measured 472.1769 [M+H]+.

Vinyl -benzyl-*N*-(9-fluorenylmethoxycarbonyl)-L-aspartate **5c**

-Benzyl-*N*-(9-fluorenylmethoxycarbonyl)-L-aspartic acid **5bError: Reference source not found** (0.5 g; 1.12 mmol) was dissolved in vinyl acetate (100 eq.; 10.5 mL). Palladium acetate (0.2 eq.; 50 mg) and potassium hydroxide (0.1 eq.; 6 mg) were added. The mixture was stirred for 24h at r.t. The mixture was poured into diethyl ether and filtered through a celite bed. After evaporation *in vacuo*, the crude product was purified by flash chromatography (hexane: ethyl acetate 5:1 v/v) to give vinyl ester **5c** (287 mg; 51%): mp 53-55°C (hexane: ethyl acetate); []D25 +8.4 (c, 0.57 CHCl3); max (film): 3427 cm-1 (NH), 1759 cm-1 (C=O), 1729 cm-1 (C=O), 1647 cm-1 (amide I), 1508 cm-1 (amide II); 1H NMR (500 MHz; CDCl3) : 7.78-7.61, 7.43-7.30 (m, 13H; benzyl and Fmoc Ar); 7.25 (dd; *J* 6.0 Hz; *J* 13.2 Hz; 1H, CH2=CH-); 5.83 (d; *J* 8.5 Hz; 1H; NH); 5.17 (s; 2H; CH2 benzyl); 4.93 (d; *J* 13.2 Hz; 1H, CHH’=CH-); 4.77 (m; 1H; CHH’=CH-); 4.59 (m; 1H); 4.37 (m; 2H, CH2 Fmoc); 4.25 (pt; *J* 7.0 Hz; 1H, CH Fmoc); 3.16 (dd; *J* 4.5 Hz; *J* 17.2 Hz; 1H, CHH’); 2.97 (dd; *J* 4.5 Hz; *J* 17.0 Hz; 1H, CHH’); 13C NMR (125 MHz; CDCl3) : 170.8, 168.3, 156.1 (3 x C=O); 144.0, 143.9, 141.5, 141.5, 141.3, 135.4, 128.9, 128.6, 128.0, 127.3, 125.3, 120.3 (C arom, CH vinyl); 99.5 (CH2 vinyl); 67.6, 67.3 (CH2 benzyl and CH2 Fmoc); 50.4, 47.3 (2 x CH); 36.8 (CH2); MS (ES+): m/z=494 (100, [M+Na]+); HRMS (ES+): calculated for C28H26NO6 472.1760; measured 472.1766 [M+H].

Benzyl -vinyl-*N*-(*t*-butyloxycarbonyl)-L-aspartate **6c**

Benzyl *N*-(*t*-butylcarbonyl)-L-aspartate **6b** (0.2 g; 0.62 mmol) was dissolved in vinyl acetate (100 eq.; 5.6 mL). Palladium acetate (0.2 eq.; 28 mg) and potassium hydroxide (0.1 eq.; 3.5 mg) were added. The mixture was stirred for 24h at r.t. The mixture was poured into diethyl ether and filtered through a celite bed. After evaporation *in vacuo*, the crude product was purified by flash chromatography (hexane: ethyl acetate 9:1 then 7/3 v/v) to give vinyl ester **6c** (156 mg; 72%) as an oil: []D25 +15.1 (c, 0.6 CHCl3); max (film): 3440 cm-1 (NH), 1751 cm-1 (C=O), 1699 cm-1 (C=O), 1648 cm-1 (amide I), 1498 cm-1 (amide II); 1H NMR (500 MHz; CDCl3) : 7.32-7.29 (m; 5H arom; benzyl); 7.17 (dd; *J* 7.2 Hz; *J* 14.8 Hz; CHH’=CH-); 5.47 (d; *J* 9.6 Hz; 1H; NH); 5.17 (s; 2H; CH2 benzyl); 4.86 (dd; *J* 1.9 Hz; *J* 14.8 Hz; 1H, CHH’=CH-); 4.60 (m; 1H, H); 4.58 (dd; *J* 1.9 Hz; *J* 7.2 Hz; CHH'=CH-); 3.08 (dd; *J* 3.7 Hz; *J* 17.6 Hz; 1H, CHH’); 2.91 (dd; *J* 4.9 Hz; *J* 16.8 Hz; 1H, CHH’); 1.41 (s; 9H; C(CH3)3); 13C NMR (125 MHz; CDCl3) : 170.9, 168.4, 155.6 (3 x CO); 140.9 (CH vinyl), 135.4, 128.8, 128.5, 127.8 (C arom); 98.8 (CH2 vinyl); 80.5 (C(CH3)3); 67.8 (CH2 benzyl); 50.1 (CH); 36.8 (CH2); 28.5 (C(CH3)3); MS: m/z=372 (100, [M+Na]+); HRMS (ES+): C18H27N2O6 calculated 367.1869; measured 367.1867 [M+NH4]+.

Benzyl -vinyl-*N*-(*t*-butyloxycarbonyl)-L-glutamate **7c**

Benzyl *N*-(*t*-butylcarbonyl)-L-glutamate **7b**[[3]](#endnote-4) (0.3 g; 0.89 mmol) was dissolved in vinyl acetate (100 eq.; 8.2 mL). Palladium acetate (0.2 eq.; 40 mg) and potassium hydroxide (0.1 eq.; 5.0 mg) were added. The mixture was stirred for 24h at r.t. The mixture was poured into diethyl ether and filtered through a celite bed. After evaporation *in vacuo*, the crude product was purified by flash chromatography (hexane: ethyl acetate 9:1 then 7/3 v/v) to give vinyl ester **7c** (210 mg; 65%): mp 43-45°C (hexane: ethyl acetate); []D25 +4.8 (c, 0.3 CHCl3); max (film): 3433 cm-1 (NH), 1747 cm-1 (C=O), 1720 cm-1 (C=O), 1647 cm-1 (amide I), 1500 cm-1 (amide II); 1H NMR (500 MHz; CDCl3) : 7.38-7.28 (m; 5H arom; benzyl); 7.26 (dd; *J* 6.4 Hz; *J* 13.9 Hz; 1H, CH2=CH-); 5.21 (d; *J* 9.0 Hz; 1H; NH); 5.18 (s; 2H; CH2 benzyl); 4.88 (dd; *J* 1.7 Hz; *J* 13.9 Hz; 1H, CHH’=CH-); 4.58 (dd; *J* 1.7 Hz; *J* 6.4 Hz; 1H CHH'=CH-); 4.41 (m; 1H); 2.47 (m; 2H); 2.24 (m; 1H); 1.99 (m; 1H); 1.43 (s; 9H; C(CH3)3); 13C NMR (125 MHz; CDCl3) : 171.9, 169.8, 155.3 (3 x CO); 141.0., 135.1, 128.6, 128.5, 128.3 (C arom and CH vinyl); 97.9 (CH2 vinyl); 80.1 (C(CH3)3); 67.3 (CH2 benzyl); 52.8 (CH); 29.9 (CH2); 28.2 (C(CH3)3); 27.4 (CH2); MS (ES+): m/z=386 (100, [M+Na]+); HRMS (ES+): C19H26NO6 calculated 364.1760; measured 364.1757 [M+H]+.

Vinyl -benzyl-*N*-(benzyloxycarbonyl)-L-glutamate **8c**

-Benzyl-*N*-(benzyloxycarbonyl)-L-glutamic acid **8b**[[4]](#endnote-5) (0.3 g; 0.61 mmol) was dissolved in vinyl acetate (100 eq.; 7.4 mL). Palladium acetate (0.2 eq.; 36 mg) and potassium hydroxide (0.1 eq.; 4.5 mg) were added. The mixture was stirred for 24h at r.t. The mixture was poured into diethyl ether and filtered through a celite bed. After evaporation *in vacuo*, the crude product was purified by flash chromatography (hexane: ethyl acetate 9:1 then 7/3 v/v) to give the acyl donor **8c** (51 mg; 16%) as an oil:[]D25 +10.0 (c, 0.2 CHCl3); max (film): 3433 cm-1 (NH), 1726 cm-1 (C=O), 1660 cm-1 (amide I), 1507 cm-1 (amide II); 1H NMR (500 MHz; CDCl3) : 7.37-7.33 (m; 10H arom; benzyl); 7.21 (dd; *J* 6.3 Hz; *J* 14.2 Hz; CHH’=CH-); 5.42 (d; *J* 6.5 Hz; 1H; NH); 5.08 (s; 4H; 2 x CH2 benzyl); 4.93 (dd; *J* 1.4 Hz; *J* 14.2 Hz; CHH’=CH-); 4.64 (dd; *J* 1.4 Hz; *J* 6.3 Hz; 1H CHH’=CH-); 4.48 (m; 1H); 2.48 (m; 2H); 2.28 (m; 1H); 2.03 (m; 1H); 13C NMR (125 MHz; CDCl3) : 172.4, 169.1, 155.9 (3 x CO); 140.8, 136.0, 135.6, 128.5, 128.2, 128.1 (C arom, CH vinyl); 99.2 (CH2 vinyl); 67.1, 66.6 (2 x CH2 benzyl); 53.2 (CH); 30.1, 27.2 (2 x CH2); MS (ES+): m/z=420 (100, [M+Na]+); HRMS (ES+): C22H24NO6 calculated 398.1604; measured 398.1601 [M+H]+.

Preparation of Subtilisin *Bacillus* *lentus* (SBL)

50 mg of pure lyophilised SBL was added to 5 mL of 0.1M phosphate buffer (pH 8.0) and freeze-dried.

General procedure for SBL-catalyzed acylation

0.56mmol of carbohydrate acyl-acceptor **9**-**20a**, 0.89mmol (1.6 equiv.) amino acid vinyl ester **1**-**8c** (1.6 eq.) and 10mg of pH adjusted SBL preparation were suspended in 5 mL of anhydrous pyridine and stirred under nitrogen at 45oC for 120 h. In all cases, no background reaction in the absence of SBL was detected. The reaction mixture was filtered through celite, evaporated and the residue purified by flash chromatography (MeOH:EtOAc, 1:19 or CHCl3:MeOH:AcOH:H2O, 90:10:0.5:1 or CHCl3:MeOH:AcOH:H2O, 85:13:0.5:1.5) to give the following acylated sugars **9**-**20b,c**:

6-*O*-carboxy-(*N*-acetyl-phenylalanine)-,-D-glucopyranose **9bError: Reference source not found**: []D25 +31.6 (c, 0.50 in MeOH); max (KBr): 3424 cm-1 (OH, NH), 1758 cm-1 (C=O), 1652 cm-1 (amide I), 1540 cm-1 (amide II); 1H NMR (500MHz; CD3OD, : = 56:44):  7.28-7.24 (m; 5H; H arom); 5.12 (d; *J* 3.9 Hz; 1H; H-1); 4.71 (dd; *J* 5.6 Hz; *J* 7.9 Hz; 1H; H); 4.51 (d; *J* 7.1 Hz; 1H; H-1); 4.44 (m; 1H; H-6); 4.26 (m; 1H; H-6’); 4.01 (m; 1H); 3.70 (t; *J* 6.6 Hz; 1H); 3.38 (m; 1H); 3.21 (m; 1H; CHH’); 3.17 (m; 1H); 2.96 (m; 1H; CHH’); 1.91 (s; 3H; NHCOCH3); 13C NMR (125.7MHz; CD3OD):  172.1, 171.8, 171.7 (CO); 137.1, 137.0, 129.1, 129.08, 129.0, 128.3, 126.7 (C arom); 97.0 (C-1); 92.8 (C-1); 76.7, 75.0, 74.0, 73.6, 72.6, 70.8, 70.5, 69.4 (C-2; C-3; C-4; C-5); 64.6, 64.5 (C-6); 54.2, 54.1 (CH amino acid); 37.2, 37.1 (CH2 amino acid); 21.2, 21.1 (NHCOCH3); MS (ES+): m/z=392 (100, [M+Na]+); HRMS (ES+): calculated 392.1321; measured 392.1315 [M+Na]+.

6-*O*-carboxy-(*N*-acetyl-phenylalanine)-,-D-galactopyranose **10b**: []D 25 +37.6 (c, 0.69 in MeOH); max (KBr): 3436 cm-1 (OH, NH), 1758 cm-1 (C=O), 1656 cm-1 (amide I), 1540 cm-1 (amide II); 1H NMR (500MHz; CD3OD, : = 1:1): 7.30-7.21 (m; 5H; H arom); 5.11 (d; *J* 4.6 Hz; H-1); 4.72 (dd; *J* 5.0 Hz; *J* 9.3 Hz; 1H; H); 4.51 (d; *J* 7.8 Hz; H-1); 4.44 (m; 1H; H-6); 4.26 (m; 1H; H-6’); 4.01 (m; 1H); 3.70 (m; 1H); 3.39 (m; 1H); 3.20 (m; 1H); 3.15 (m; 1H; CHH’); 2.96 (m; 1H; CHH’); 1.91 (s; 3H; NHCOCH3); 13C NMR (125.7MHz; CD3OD): 172.1, 171.8, 171.7 (CO); 137.1, 129.1, 129.0, 128.3, 126.7 (C arom); 97.0 (C-1); 92.8 (C-1); 76.7, 74.9, 74.0, 73.6, 72.5, 70.8, 70.5, 69.4 (C-2; C-3; C-4; C-5); 64.6, 64.5 (C-6); 54.2, 54.1 (CH amino acid); 37.2, 37.1 (CH2 amino acid); 21.2, 21.1 (NHCOCH3); MS (ES+): m/z=392 (100, [M+Na]+); HRMS (ES+): calculated 392.1321; measured 392.1321 [M+Na]+.

6-*O*-carboxy-(*N*-acetyl-phenylalanine)--D-mannopyranose **11b**: []D 25 +10.8 (eqlbm) (c, 0.81 in MeOH);max (KBr): 3280 cm-1 (OH, NH), 1744 cm-1 (C=O), 1648 cm-1 (amide I), 1552 cm-1 (amide II); 1H NMR (500MHz; CD3OD):  7.27-7.20 (m; 5H; H arom); 5.09 (s; 1H; H-1); 4.75 (dd; *J* 5.4 Hz; *J* 9.4 Hz; 1H; H); 4.44 (d; *J* 11.7 Hz; 1H; H-6); 4.31 (dd; *J* 7.4 Hz; *J* 11.7 Hz; 1H; H-6’); 3.97 (dd; *J* 7.4 Hz; *J* 8.9 Hz; 1H; H-5); 3.81 (m; 2H; H-2, H-3); 3.66 (t; *J* 8.9 Hz; 1H; H-4); 3.24 (dd; *J* 5.4 Hz; *J* 13.3 Hz; 1H; CHH’); 2.96 (dd; *J* 9.4 Hz; *J* 13.3 Hz; 1H; CHH’); 1.91 (s; 3H; NHCOCH3); 13C NMR (125.7MHz; CD3OD): 172.2, 171.8 (2 x CO); 137.1, 129.1, 129.0, 128.3, 126.7 (C arom); 94.8 (C-1); 71.7, 71.0, 70.4, 67.6 (C-2; C-3; C-4; C-5); 64.7 (C-6); 54.1 (CH amino acid); 37.1 (CH2 amino acid); 21.2 (NHCOCH3); MS (ES+): m/z=392 (100, [M+Na]+); HRMS (ES+): calculated 392.1321; measured 392.1321 [M+Na]+.

Methyl 6-*O*-carboxy-(*N*-acetyl-L-phenylalanine)--D-glucopyranoside **13b**: []D25 +82.6 (c, 0.53 in MeOH); max (KBr): 3416 cm-1 (OH, NH), 1748 cm-1 (C=O), 1658 cm-1 (amide I), 1546 cm-1 (amide II); 1H NMR (500MHz; CD3OD): 7.31-7.19 (m; 5H arom); 4.72 (dd; *J* 4.9 Hz; *J* 8.5 Hz; 1H; H); 4.66 (d; *J* 4.1 Hz; 1H; H-1); 4.42 (dd; *J* 2.5 Hz; *J* 11.7 Hz; 1H; H-6); 4.25 (dd; *J* 6.4; *J* 11.7 Hz; 1H; H-6’); 3.75 (ddd; *J* 2.5 Hz; *J* 6.4 Hz; *J* 10.1 Hz; H-5); 3.62 (t; *J* 9.5 Hz; H-3); 3.40-3.38 (m and s; 4H; H-4 and OCH3); 3.26 (t; *J* 9.0 Hz; 1H; H-2); 3.21 (dd; *J* 4.9 Hz; *J* 14.3 Hz; 1H; CHH’); 2.96 (dd; *J* 8.5 Hz; *J* 14.3 Hz; 1H; CHH’); 1.90 (s; 3H; NHCOCH3); 13C NMR (125.7MHz; CD3OD): 172.0, 171.7 (2 x CO); 137.1, 129.0, 128.3, 126.7 (C arom); 100.1 (C-1); 73.8 (C-3); 72.2 (C-4); 70.7 (C-2); 69.5 (C-5); 64.6 (C-6); 54.5 (OCH3); 54.1 (CH amino acid); 37.1 (CH2 amino acid); 21.1 (NHCOCH3); MS (ES+): m/z=406 (100, [M+Na]+); HRMS (ES+): calculated 384.1658; measured 384.1662 [M+H].

Methyl 6-*O*-carboxy-(*N*-acetyl-L-phenylalanine)--D-glucopyranoside **14b**: []D25 -17.9 (c, 0.56 in MeOH);max (KBr): 3422 cm-1 (OH, NH), 1753 cm-1 (C=O), 1652 cm-1 (amide I), 1544 cm-1 (amide II); 1H NMR (500MHz; CD3OD): 7.33-7.17 (m; 5H arom); 4.73 (dd; *J* 4.9 Hz; *J* 8.1 Hz; 1H; H); 4.44 (dd; *J* 2.6 Hz; *J* 11.8 Hz; 1H; H-6); 4.28 (dd; *J* 6.0 Hz; *J* 11.8 Hz; 1H; H-6’); 4.20 (d; *J* 8.0 Hz; 1H; H-1); 3.54-3.47 (m and s; 4H; H-5 and OCH3); 3.29 (t; *J* 8.9 Hz; 1H; H-4); 3.21 (dd; *J* 4.9 Hz; *J* 14.0 Hz; 1H; CHH’); 3.18 (dd; *J* 9.2 Hz; *J* 8.0 Hz; 1H; H-2); 2.96 (dd; *J* 8.1 Hz; *J* 14.0 Hz; 1H; CHH’); 1.91 (s; 3H; NHCOCH3); 13C NMR (125.7MHz; CD3OD): 173.2, 172.8 (2 x CO); 138.2, 130.2, 129.5, 127.9 (C arom); 105.4 (C-1); 77.8 (C-3); 75.1, 74.9 (C-4, C-5); 71.6 (C-2); 65.5 (C-6); 57.3 (OCH3); 55.3 (CH amino acid); 38.3 (CH2 amino acid); 22.2 (NHCOCH3); MS (ES+): m/z=406 (100, [M+Na]+); HRMS (ES+): calculated 406.1478; measured 406.1475 [M+Na];

Methyl 6-*O*-carboxy-(*N*-acetyl-L-phenylalanine)--D-galactopyranoside **15b**[[5]](#endnote-6): []D 25 -1.9 (c, 0.70 in MeOH); ); [lit.Error: Reference source not found []D25 +15.6 (c 2.5, H2O) for a 95% mixture of **15b** with other products]; max (KBr): 3428 cm-1 (OH, NH), 1758 cm-1 (C=O), 1656 cm-1 (amide I), 1540 cm-1 (amide II); 1H NMR (500MHz; CD3OD): 7.28-7.21 (m; 5H; H arom); 4.68 (dd; *J* 6.0 Hz; *J* 8.7 Hz; 1H; H); 4.34 (dd; *J* 8.0 Hz; *J* 11.0 Hz; 1H; H-6); 4.23 (dd; *J* 5.3 Hz; *J* 11.0 Hz; 1H; H-6’); 4.13 (d; *J* 7.6 Hz; 1H; H-1); 3.71 (dd; *J* 1.4 Hz; *J* 3.3 Hz; 1H; H-4); 3.61 (ddd; *J* 1.4 Hz; *J* 5.3 Hz; *J* 8.0 Hz; 1H; H-5); 3.50 (s; 3H; OCH3); 3.49 (dd; *J* 3.3 Hz; *J* 10.2 Hz; H-3); 3.45 (dd; *J* 7.6 Hz; *J* 10.2 Hz; 1H; H-2); 3.15 (dd; *J* 6.0 Hz; *J* 13.6 Hz; 1H; CHH’); 2.99 (dd; *J* 8.7 Hz; *J* 13.6 Hz; 1H; CHH’); 1.92 (s; 3H; NHCOCH3); 13C NMR (125.7MHz; CD3OD): 172.1, 171.7 (2 x CO); 137.3, 129.0, 128.4, 126.8 (C arom); 104.7 (C-1); 73.5, 72.5, 71.1, 68.9 (C-2; C-3; C-4; C-5); 63.9 (C-6); 56.1 (OCH3); 54.2 (CH amino acid); 37.2 (CH2 amino acid); 21.1 (NHCOCH3); MS (ES+): m/z=406 (100, [M+Na]+); HRMS (ES+): calculated 406.1478; measured 406.1474 [M+Na];

Methyl 6-*O*-carboxy-(*N*-acetyl-L-phenylalanine)--D-mannopyranoside **16b**: []D25 +35.0 (c, 0.62 in MeOH); max (KBr): 3404 cm-1 (OH, NH), 1751 cm-1 (C=O), 1654 cm-1 (amide I), 1538 cm-1 (amide II); 1H NMR (500MHz; CD3OD): 7.28-7.22 (m; 5H; H arom); 4.75 (dd; *J* 5.7 Hz; *J* 9.5 Hz; 1H; H); 4.63 (d; *J* 1.6 Hz; H-1); 4.44 (dd; *J* 1.8 Hz; *J* 11.6 Hz; 1H; H-6); 4.30 (dd; *J* 6.2 Hz; *J* 11.6 Hz; 1H; H-6’); 3.70 (m; 1H; H-5); 3.89 (m; 1H; H-3); 3.80 (dd; *J* 1.6 Hz; *J* 3.2 Hz; 1H; H-2); 3.65 (t; *J* 9.6 Hz; H-4); 3.37 (s; 3H; OCH3); 3.22 (dd; *J* 5.7 Hz; *J* 13.9 Hz; 1H; CHH’); 2.96 (dd; *J* 9.5 Hz; *J* 13.9 Hz; 1H; CHH’); 1.90 (s; 3H; NHCOCH3); 13C NMR (125.7MHz; CD3OD): 171.7, 172.0 (2 x CO); 137.1, 129.1, 128.3, 126.7 (C arom); 101.6 (C-1); 71.3, 70.8, 70.7, 67.4 (C-2; C-3; C-4; C-5); 64.7 (C-6); 54.2 (CH amino acid), 54.1 (OCH3).; 37.2 (CH2 amino acid); 21.1 (NHCOCH3); MS (ES+): m/z=406 (100, [M+Na]+); HRMS (ES+): calculated 401.1924; measured 401.1916 [M+NH4]+.

Phenyl 6-*O*-carboxy-(*N*-acetyl-L-phenylalanine)-1-thio--D-glucopyranoside **17b:** []D 25 -17.0 (c, 0.43 MeOH); max (KBr): 3412 cm-1 (OH, NH), 1740 cm-1 (C=O), 1658 cm-1 (amide I), 1538 cm-1 (amide II);1H NMR (500MHz; CD3OD):  7.53 (dd; *J* 8.2 Hz; *J* 1.5 Hz; 2H; H arom); 7.28-7.18 (m; 8H; H arom); 4.73 (dd; *J* 5.3 Hz; *J* 8.8 Hz; 1H; H); 4.67 (d; *J* 9.5 Hz; 1H; H-1); 4.47 (dd; *J* 1.7 Hz; *J* 11.6 Hz; 1H; H-6); 4.21 (dd; *J* 6.0 Hz; *J* 11.6 Hz; 1H; H-6’); 3.55 (ddd; *J* 1.7 Hz; *J* 6.0 Hz; *J* 9.5 Hz; 1H; H-5); 3.40 (t; *J* 9.4 Hz; 1H; H-3); 3.25 (pt, *J* 9.0 Hz, 1H, H-4), 3.22 (dd, *J* 8.5 Hz, *J* 9.5 Hz, 1H, H-2); 3.14 (dd; *J* 4.7 Hz; *J* 13.8 Hz; 1H; CHH’); 2.91 (dd; *J* 8.8 Hz; *J* 13.2 Hz; 1H; CHH’); 1.91 (s; 3H; NHCOCH3); 13C NMR (125.7MHz; CD3OD): 173.2, 172.8 (2 x CO); 138.1, 134.8, 132.9, 130.3, 129.9, 129.5, 128.4, 127.8 (C arom); 88.9 (C-1); 79.4 (C-3); 78.9 (C-4); 73.6, 71.5 (C-2, C-5); 65.8 (C-6); 55.2 (CH amino acid); 38.3 (CH2 amino acid); 22.3 (NHCOCH3); MS (ES+): m/z=484 (100, [M+Na]+); HRMS (ES+): calculated 462.1586; measured 462.1594 [M+H].

Phenyl 3-*O*-carboxy-(*N*-acetyl-L-phenylalanine)-1-thio--D-glucopyranoside **17c**: []D25 +4.0 (c, 0.1 CHCl3);max (KBr): 3404 cm-1 (OH, NH), 1734 cm-1 (C=O), 1653 cm-1 (amide I), 1544 cm-1 (amide II); 1H NMR (500MHz; CD3OD):  7.60-7.21 (m; 10H; H arom); 5.02 (t; *J* 9.3 Hz; H-3); 4.70 (d; *J* 9.5 Hz; 1H; H-1); 4.65 (dd; *J* 2.0 Hz; *J* 6.0 Hz; 1H; H); 3.88 (dd; *J* 2.0 Hz; *J* 11.6 Hz; 1H; H-6); 3.71 (dd; *J* 4.8 Hz; *J* 11.6 Hz; 1H; H-6’); 3.53 (t; *J* 10.0 Hz; 1H; H-2); 3.43-3.39 (m; 2H; H-4 and H-5); 3.00 (dd; *J* 8.7 Hz; *J* 13.9 Hz; 1H; CHH’); 2.90 (dd; *J* 8.1 Hz; *J* 13.9 Hz; 1H; CHH’); 1.91 (s; 3H; NHC(O)CH3); 13C NMR (125.7MHz; CD3OD): 171.6, 169.0 (2 x CO); 137.3, 137.0, 136.7, 133.8, 129.2, 128.9, 128.3, 126.7 (C arom); 97.9 (C-1); 88.3, 80.6, 70.7, 68.1 (C-2; C-3; C-4; C-5); 61.2 (C-6); 54.2 (CH amino acid); 37.2 (CH2 amino acid); 21.1 (NHC(O)CH3); MS (ES+): m/z=484 (100, [M+Na]+); HRMS (ES+): calculated 462.1586; measured 462.1592 [M+H].

Phenyl 6-*O*-carboxy-(*N*-acetyl-L-phenylalanine)-1-thio--D-galactopyranoside **18b**:[]D25 +7.3 (c, 0.2 in MeOH); max (KBr): 3388 cm-1 (OH, NH), 1743 cm-1 (C=O), 1653 cm-1 (amide I), 1542 cm-1 (amide II); 1H NMR (500MHz; CD3OD):  7.50 (m; 2H; H arom); 7.25-7.16 (m; 8H; H arom); 4.68 (dd; *J* 5.8 Hz; *J* 8.7 Hz; 1H; H); 4.63 (d; *J* 9.8 Hz; 1H; H-1); 4.32 (dd; *J* 7.4 Hz; *J* 11.3 Hz; 1H; H-6); 4.23 (dd; *J* 4.0 Hz; *J* 11.3 Hz; 1H; H-6’); 3.80 (d; *J* 3.5 Hz; 1H; H-4); 3.70 (ddd; *J* 1.4 Hz; *J* 4.0 Hz; *J* 7.4 Hz; 1H; H-5); 3.61 (t; *J* 9.4 Hz; 1H; H-2); 3.49 (dd; *J* 3.5 Hz; *J* 9.6 Hz; 1H; H-3); 3.08 (dd; *J* 3.7 Hz; *J* 13.4 Hz; 1H; CHH’); 2.91 (dd; *J* 8.3 Hz; *J* 13.4 Hz; 1H; CHH’); 1.91 (s; 3H; NHCOCH3); 13C NMR (125.7MHz; CD3OD): 173.2, 172.8 (2 x CO); 130.3-129.5 (C arom); 89.9 (C-1); 77.6, 75.9, 70.8, 70.4 (C-2; C-3; C-4;C-5); 65.9 (C-6); 55.3 (CH amino acid); 38.4 (CH2 amino acid); 22.2 (NHCOCH3); MS (ES+): m/z=484 (100, [M+Na]+); HRMS (ES+): calculated 462.1586; measured 462.1587 [M+H]+.

Phenyl 6-*O*-carboxy-(*N*-acetyl-L-phenylalanine)-1-thio--D-mannopyranoside **19b**: []D25 +126.0 (c, 0.25 in MeOH);max (KBr): 3398 cm-1 (OH, NH), 1750 cm-1 (C=O), 1656 cm-1 (amide I), 1544 cm-1 (amide II); 1H NMR (500MHz; CD3OD):  7.50 (m; 2H; H arom); 7.40-7.10 (m; 8H; H arom); 5.47 (d; *J* 1.5 Hz; 1H; H-1); 4.71 (dd; *J* 5.1 Hz; *J* 8.4 Hz; 1H; H); 4.64 (dd; *J* 4.6 Hz; *J* 11.3 Hz; 1H; H-6); 4.32 (dd; *J* 6.4 Hz; *J* 11.3 Hz; 1H; H-6’); 4.28 (m, 1H; H-4); 4.12 (dd; *J* 1.5 Hz; *J* 3.0 Hz; 1H; H-2); 3.73 (m, 1H, H-5), 3.71 (dd; *J* 3.0 Hz; *J* 5.4 Hz; 1H; H-3); 3.12 (dd; *J* 4.5 Hz; *J* 12.8 Hz; 1H; CHH’); 2.86 (dd; *J* 9.0 Hz; *J* 12.8 Hz; 1H; CHH’); 1.90 (s; 3H; NHCOCH3); 13C NMR (125.7MHz; CD3OD): 171.9, 171.6 (2 x CO); 137.4-126.6 (C arom); 89.0 (C-1); 72.3, 71.9, 71.8, 67.7 (C-2; C-3; C-4; C-5); 64.6 (C-6); 53.9 (CH amino acid); 37.1 (CH2 amino acid); 21.1 (NHCOCH3); MS (ES+): m/z=484 (100, [M+Na]+). HRMS (ES+): calculated 479.1852; measured 479.1852 [M+NH4]+.

Phenyl 2-*N*-acetyl-6-*O*-carboxy-(*N*-acetyl-L-phenylalanine)-1-seleno--D-glucosamine **20b**: []D25 +17.5 (c, 0.1 CHCl3); max (KBr): 3288 cm-1 (OH, NH), 1752 cm-1 (C=O), 1653 cm-1 (amide I), 1550 cm-1 (amide II); 1H NMR (500MHz; CD3OD):  7.57 (m; 2H; H arom); 7.26-7.16 (m; 8H; H arom); 5.01 (d; *J* 10.0 Hz; 1H; H-1); 4.71 (dd; *J* 4.9 Hz; *J* 9.5 Hz; 1H; H); 4.47 (dd; *J* 2.2 Hz; *J* 11.7 Hz; 1H; H-6); 4.19 (dd; *J* 6.5 Hz; *J* 11.7 Hz; 1H; H-6’); 3.85 (dd; *J* 1.7 Hz; *J* 12.3 Hz; 1H; H-4); 3.83 (t; *J* 9.3 Hz; 1H; H-2); 3.49 (ddd; *J* 1.7 Hz; *J* 6.5 Hz; *J* 9.5 Hz; 1H; H-5); 3.44 (t; *J* 9.7 Hz; 1H; H-3); 3.12 (dd; *J* 4.9Hz; *J* 13.6 Hz; 1H; CHH’); 2.90 (dd; *J* 9.5 Hz; *J* 13.6 Hz; 1H; CHH’); 1.98 (s; 3H; NHC(O)CH3); 1.91 (s; 3H; NHC(O)CH3); 13C NMR (125.7MHz; CD3OD): 172.4, 172.1, 171.6 (3 x CO); 136.9-126.7 (C arom); 83.5 (C-1); 79.0, 75.9, 70.7, 64.6 (C-2; C-3; C-4; C-5); 55.6 (C-6); 54.0 (CH amino acid); 37.1 (CH2 amino acid); 21.8, 21.1 (2 x NHC(O)CH3); MS (ES+): m/z=573 (100, [M+Na]+); HRMS (ES+): calculated 551.1296; measured 551.1292 [M+H]+.

# General procedure for TL-CLEC-catalyzed acylation

**16a** (0.56mmol), **1c** (1.6 eq.) and 3 mg of CLEC-thermolysin (TL-CLEC) were suspended in a mixture of 2.5:0.1 mL of pyridine: water and stirred under nitrogen at 45˚ C for 120 h. The mixture was filtered, concentrated and the residue purified by flash chromatography (CHCl3:MeOH:AcOH:H2O, 85:10:0.5:1) to give **16b** (48%).

Methyl 6-*O*-carboxyl-(*N*-*tert*-butyloxycarbonyl-L-phenylalanine)--D-mannopyranoside **16c**

Methyl -D-mannopyranoside (50 mg; 0.3 mmol), *N*-*tert*-butyloxycarbonyl-L-phenylalanine vinyl ester **2c** (119 mg; 1.6 eq.) and 50 mg of pH adjusted SBL preparation were suspended in 5 mL of anhydrous pyridine and stirred under nitrogen at 45oC for 500h. The reaction was then concentrated *in vacuo* and the residue purified by flash chromatography (chloroform/ methanol/ acetic acid/ water 90/ 4/ 0.5/ 1 v/ v) to give after lyophilisation the 6-*O*-acyl sugar **16c** as the major compound (79mg; 63%, (shortened reaction times of 120 h gave 32% of **16c**)): []D25 +37.4 (c 0.64, MeOH); max (KBr): 3380 cm-1 (OH, NH), 1756 cm-1 (C=O), 1526 cm-1 (amide II), 1457 cm-1; 1H NMR (500 MHz; CD3OD): 7.27-7.22 (m, 5H, H arom), 4.63 (d, *J* 1.5 Hz, 1H, H-1), 4.47 (dd, *J* 1.9 Hz, *J* 11.8 Hz, 1H, H-6), 4.44 (m, 1H, H), 4.28 (dd; *J* 6.8 Hz; *J* 11.8 Hz; 1H; H-6’), 3.81 (dd, *J* 1.5 Hz, *J* 3.1 Hz, 1H, H-2), 3.72 (ddd, *J* 1.9 Hz, *J* 6.8 Hz, *J* 9.2 Hz, 1H, H-5), 3.68 (dd, *J* 3.1 Hz, *J* 8.7 Hz, 1H, H-3), 3.63 (t, *J* 9.4 Hz, 1H, H-4), 3.37 (s, 3H, OCH3), 3.18 (dd, *J* 4.9 Hz, *J* 13.8 Hz, 1H, CHH’), 2.92 (dd, *J* 9.0 Hz, *J* 13.7 Hz, 1H, CHH’), 1.37 (s, 9H, C(CH3)3); 13C NMR (125 MHz; CD3OD): 173.5, 157.7 (2 x C=O), 138.4, 130.3, 129.4, 127.7 (C arom), 102.7 (C-1), 80.5 (C(CH3)3), 72.5, 71.9, 71.8, 69.7 (C-2, C-3, C-4, C-5), 65.9 (C-6), 56.5 (CH amino acid), 55.4 (OCH3), 38.7 (CH2 amino acid), 28.6 (C(CH3)3); MS (ES+): m/z=464 (100, [M+Na]+); HRMS (ES+): C21H32O9N calculated 442.2077; measured 442.2077 [M+ H]+; and methyl 3-*O*-carboxyl-(*N*-*tert*-butyloxycarbonyl-L-phenylalanine)--D-mannopyranoside **16d** (20 mg; 17%): []D25 +31.2 (c 0.12, MeOH); max (KBr): 3420 cm-1 (OH, NH), 1752 cm-1 (C=O), 1698 cm-1 (C=O), 1526 cm-1 (amide I), 1460 cm-1 (amide II); 1H NMR (500 MHz; CD3OD): 7.33-7.19 (m, 5H, H arom), 5.02 (dd, *J* 3.1 Hz, *J* 9.6 Hz, 1H, H-3), 4.66 (d, *J* 1.2 Hz, 1H, H-1), 4.44 (dd, *J* 4.4 Hz, *J* 7.3 Hz, 1H, H), 3.92 (m, 1H, H-2), 3.90-3.83 (m, 2H, H-6,6’), 3.73 (m, 1H, H-5), 3.61 (m, H-4), 3.41 (s, 3H, OCH3), 3.25 (dd, *J* 3.9 Hz, *J* 14.9 Hz, 1H, CHH’), 2.92 (m, 1H, CHH’), 1.39 (s, 9H, C(CH3)3);13C NMR (125 MHz; CD3OD): 173.2, 158.0 (2 x C=O), 138.5, 130.4, 129.4, 127.8 (C arom), 102.5 (C-1), 80.7 (C(CH3)3), 76.8 (C-3), 74.7, 74.5, 69.7 (C-2, C-4, C-5), 62.6 (C-6), 56.6 (CH amino acid), 55.3 (OCH3), 38.6 (CH2 amino acid), 28.7 (C(CH3)3); MS (ES+): m/z=464 (100, [M+Na]+); HRMS (ES+): C21H32O9N calculated 442.2077; measured 442.2075 [M+ H]+.

Methyl-6-*O*-carboxyl-(*N*-benzyloxycarbonyl-L-phenylalanine)--D-mannopyranoside **16e**

Methyl -*D*-mannopyranoside **16a** (50 mg; 0.3 mmol), *N*-benzyloxycarbonyl-*L*-phenylalanine vinyl ester **3c** (134 mg; 1.6 eq.) and 50 mg of pH adjusted SBL preparation were suspended in 5 mL of anhydrous pyridine and stirred under nitrogen at 45oC for 500 h. The reaction was then concentrated *in vacuo* and the residue purified by flash chromatography (chloroform/ methanol/ acetic acid/ water 90/ 4/ 0.5/ 1 v/ v) to give after lyophilisation the 6-*O*-acyl sugar **16e** (75 mg; 60 %): []D25 +23.2 (c 0.15, MeOH); max (KBr): 3430 cm-1 (OH, NH), 1740 cm-1 (C=O), 1710 cm-1 (C=O), 1533 cm-1 (amide II), 1451 cm-1; 1H NMR (500 MHz; CD3OD):  7.32-7.21 (m; 10H; H arom); 5.00 (m; 2H; CH2 benzyl group); 4.63 (s; 1H; H-1), 4.51 (dd, *J* 5.0 Hz, *J* 9.5 Hz, H), 4.47 (dd; *J* 2.2 Hz; *J* 11.9 Hz; H-6), 4.30 (dd; *J* 6.4 Hz; *J* 11.9 Hz; 1H; H-6’); 3.80 (dd; *J* 1.7 Hz; *J* 3.1 Hz; 1H; H-2); 3.70 (m; 1H); 3.65 (m; 2H); 3.30 (s; 3H; OCH3); 3.23 (dd; *J* 5.4 Hz; *J* 12.2 Hz; 1H; CHH’); 2.95 (dd; *J* 8.8 Hz; *J* 12.2 Hz; 1H; CHH’); 13C NMR (125 MHz; CD3OD):  172.1,157.2 (2 x C=O), 137.2, 129.2, 128.3, 127.7, 127.5, 126.6 (C arom), 101.6 (C-1), 71.3, 70.8, 70.7, 67.5 (C-2, C-3, C-4, C-5), 66.3 (CH2 benzyl group), 64.8 (C-6), 55.9 (CH amino acid), 54.1 (OCH3), 37.4 (CH2 amino acid); MS (ES+): m/z=498 (100, [M+Na]+); HRMS (ES+): C24H33O9N2 calculated 493.2186; measured 493.2182 [M+ NH4]+.

SBL-Catalyzed Carboydrate Selective Acylations from within Mixtures

**12a** (0.56mmol), **16a** (0.56mmol), **1c** (1.6 eq.), and pH adjusted SBL preparation (10 mg) were suspended in 4 mL of anhydrous pyridine and stirred under nitrogen at 45˚ C for 7 days. The mixture was then concentrated and the residue purified by flash chromatography (CHCl3:MeOH:AcOH:H2O, 85:10:0.5:1) to **16b** (80%). The starting material **12a** was recovered as a second fraction.

**19a** (0.56mmol), **20a** (0.56mmol), **1c** (1.6 eq.), and pH adjusted SBL preparation (10 mg) were suspended in 4 mL of anhydrous pyridine and stirred under nitrogen at 45˚ C for 168 days. The mixture was then concentrated and the residue purified by flash chromatography (CHCl3:MeOH:AcOH:H2O, 85:10:0.5:1) to **19b** (47%). The starting material **20a** was recovered as a second fraction.

1. . R.C. Lloyd, M. Dickman and J.B. Jones, *Tetrahedron: Asymm*. **1998**, *9*, 551. [↑](#endnote-ref-2)
2. . L. Kisfaludy and I. Schon, *Synthesis*, 1983, 325. [↑](#endnote-ref-3)
3. . M. Kanaoka, Y. Nishizawa, *Chem. Pharm. Bull*., 1985, **33**, 5062. [↑](#endnote-ref-4)
4. . I. Tornei, *Rocz. Chem*. 1974, 1921. [↑](#endnote-ref-5)
5. . S. Riva, J. Chopineau, A.P.G. Kieboom, A.M. Klibanov, *J. Am. Chem. Soc.* **1988**, *110*, 584.

   **Scheme 1** Reagents and Conditions: i, For **1b** Ac2O, MeOH; **2b** Boc2O, NaOH (aq); **3b** ZCl, toluene, NaOH (aq); **4b** p-TsOH, BnOH, benzene, reflux then HBr/AcOH then FmocCl, Na2CO3, dioane:H2O (3:5); **5b** p-TsOH, BnOH, benzene, reflux then CuSO4, EtOH, NaOH (aq), pH 8 then FmocCl, Na2CO3, dioxane:H2O (3:5); **6b** p-TsOH, BnOH, benzene, reflux then HBr/AcOH then Boc2O, Na2CO3 *i*-PrOH:H2O (2:1), 0 oC; **7b** p-TsOH, BnOH, benzene, reflux then HI/AcOH, 50 oC then (Boc)2O, Na2CO3 *i*-PrOH:H2O (2:1), 0 oC; **8b** ZCl, toluene, NaOH (aq) then p-TsOH, BnOH, benzene, reflux then NaOH (aq), dioxane:H2O (5:1); ii, Pd(OAc)2, vinyl acetate, KOH, yield for **a****c** **1c** 40%; **2c** 68%; **3c** 60%; **4c** 80%; **5c** 51%; **6c** 72%; **7c** 65%; **8c**, 16%. [↑](#endnote-ref-6)
